# Supplementary material
Source: publisher site journal article supplement (https://www.dovepress.com/article/248167)
Supplement: Supplementary file 1 [file get_supplementary_file.php]

## **Supplemental Material to *Digital image analysis of Ki-67 stained tissue microarrays and recurrence in tamoxifen-treated breast cancer patients***

### **Immunohistochemistry for Ki-67**

Histology sections of 4 µm were cut from each TMA block and mounted onto silanized slides (#S3003; Dako, Glostrup, Denmark) and dried overnight at 37°C followed by 1 hour at 60°C. Sections were deparaffinised in xylene and rehydrated in decreasing concentrations of alcohol. Antigen was retrieved with a highly stabilized retrieval system (ImmunoPrep, Instrumec, Oslo, Norway) using 10 mM TRIS/1 mM EDTA (pH 9.0) as the retrieval buffer. Sections were heated for 3 min at 110°C followed by 10 min at 95°C, then cooled to 20°C. Ki-67 was detected using clone MIB-1 (DAKO, Glostrup, Denmark) at 1:100 dilution (Dako antibody diluent S0809), before the sections were incubated for 30 min at 22°C. For visualization, the EnVision™ Flex detection system (Dako, K8000) was used. Sections were incubated for 5 min with peroxidase-blocking reagent (SM801), 20 min with the EnVision™ FLEX/HRPDetection Reagent (SM802), 10 min with EnVision™ FLEX DAB+ Chromogen (DM827)/EnVision™ FLEX Substrate Buffer (SM803) mix and 5 min with EnVision™ FLEX Hematoxylin (K8008). The slides were then dehydrated and mounted. All immunohistochemical stainings were performed using a Dako Autostainer Link 48 instrument and EnVision™ FLEX Wash Buffer (DM831) and were controlled in the NordiQC external quality programme.

**Supplemental Figures**

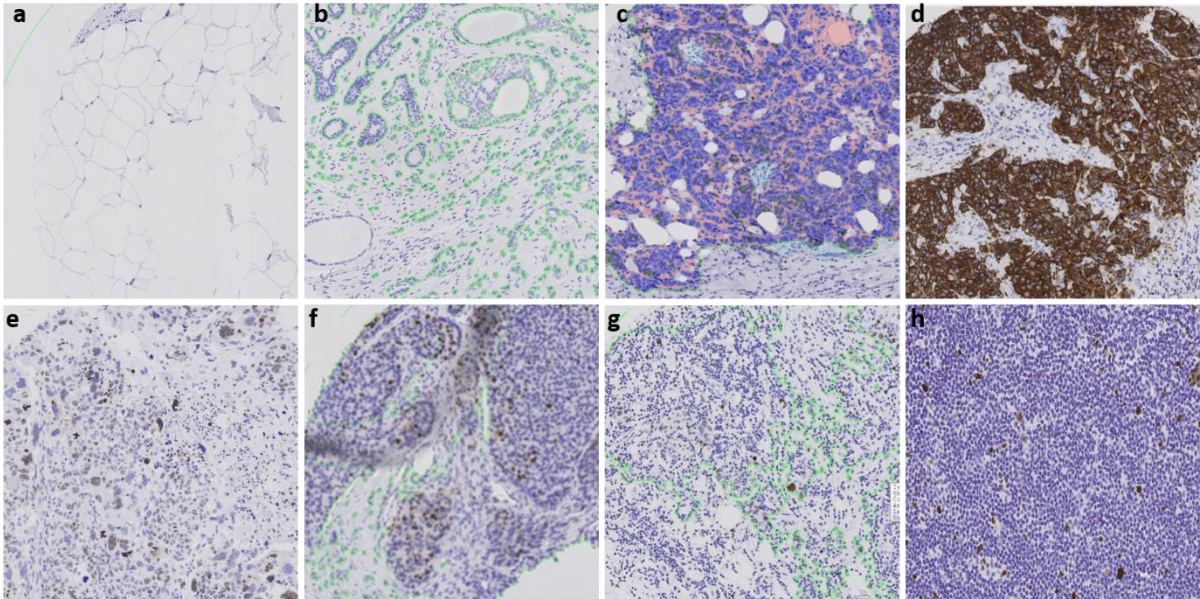

**S1 Figure.** Examples of cores that were excluded due to the following reasons: a) stroma/empty core, b) too few tumor cells present, c) excessive blue HE-staining, d) excessive membranous/cytoplasmic brown DAB-staining , e) poor morphology/too weak staining f) poor imaging/artefacts, g) and h) tumor-infiltrating lymphocytes.

## Supplemental Tables

**S1 Table. Labelling of image pixels and subsequent classification of cells in Visiopharm®.**

| Assigned label | Color | Detection of pixels | Classification |
|----------------|-------|---------------------|----------------|
| Label 001      | Green | Brown/DAB           | Ki-67 positive |
| Label 002      | Blue  | Cells/HE            | Ki-67 negative |
| Label 003      | Red   | Stroma              | Background     |

DAB: 3,3'diaminobenzidine. HE: hematoxylin- and eosin.

**S2 Table. Summary of the TMA-DIA set-up.**

| Patient IDs<br>on the 35<br>TMAs | Excluded<br>(%) | Ki-67<br>hotspot<br>Range<br>(%) | Patients<br>with Ki-67<br>score<br>≥15% | Patients<br>with Ki-67<br>score<br>≥30% | Cores remaining after DIA |           |           |
|----------------------------------|-----------------|----------------------------------|-----------------------------------------|-----------------------------------------|---------------------------|-----------|-----------|
|                                  |                 |                                  |                                         |                                         | 3                         | 2         | 1         |
| 1456                             | 149 (10)        | 0 - 92                           | 451                                     | 196                                     | 830 (57%)                 | 302 (22%) | 174 (12%) |

**S3 Table. Patient characteristics with Ki-67 median=low.**

| Patient characteristics<br>Ki-67 median=low | ER/TAM type |       |          |       |             |       |          |       |
|---------------------------------------------|-------------|-------|----------|-------|-------------|-------|----------|-------|
|                                             | ER+/TAM+    |       |          |       | ER-/TAM-    |       |          |       |
|                                             | Case status |       |          |       | Case status |       |          |       |
|                                             | Cases       |       | Controls |       | Cases       |       | Controls |       |
|                                             | N           | %     | N        | %     | N           | %     | N        | %     |
| <b>Total</b>                                | 245         | 100.0 | 276      | 100.0 | 76          | 100.0 | 79       | 100.0 |
| <b>Year of diagnosis</b>                    |             |       |          |       |             |       |          |       |
| 85-93                                       | 100         | 40.8  | 106      | 38.4  | 19          | 25.0  | 20       | 25.3  |
| 94-96                                       | 55          | 22.4  | 62       | 22.5  | 25          | 32.9  | 21       | 26.6  |
| 97-01                                       | 90          | 36.7  | 108      | 39.1  | 32          | 42.1  | 38       | 48.1  |
| <b>Age at diagnosis</b>                     |             |       |          |       |             |       |          |       |
| 35-44                                       | 10          | 4.1   | <= 5     |       | 12          | 15.8  | 12       | 15.2  |
| 45-54                                       | 50          | 20.4  | 62       | 22.5  | 32          | 42.1  | 28       | 35.4  |
| 55-64                                       | 134         | 54.7  | <= 142   |       | 21          | 27.6  | 26       | 32.9  |
| 65-70                                       | 51          | 20.8  | 71       | 25.7  | 11          | 14.5  | 13       | 16.5  |
| <b>Menopausal status</b>                    |             |       |          |       |             |       |          |       |
| Premenopausal                               | 17          | 6.9   | 15       | 5.4   | 29          | 38.2  | 34       | 43.0  |
| Postmenopausal                              | 228         | 93.1  | 261      | 94.6  | 47          | 61.8  | 45       | 57.0  |

| Patient characteristics<br>Ki-67 median=low | ER/TAM type |      |          |      |             |       |          |       |
|---------------------------------------------|-------------|------|----------|------|-------------|-------|----------|-------|
|                                             | ER+/TAM+    |      |          |      | ER-/TAM-    |       |          |       |
|                                             | Case status |      |          |      | Case status |       |          |       |
|                                             | Cases       |      | Controls |      | Cases       |       | Controls |       |
|                                             | N           | %    | N        | %    | N           | %     | N        | %     |
| <b>UICC tumor stage</b>                     |             |      |          |      |             |       |          |       |
| <b>I</b>                                    | <=5         |      | <= 5     |      | 7           | 9.2   | <= 5     |       |
| <b>II</b>                                   | 109         | 44.5 | 117      | 42.4 | 38          | 50.0  | 36       | 45.6  |
| <b>III</b>                                  | <= 135      |      | <= 158   |      | 31          | 40.8  | <= 42    |       |
| <b>Histological grade</b>                   |             |      |          |      |             |       |          |       |
| <b>I</b>                                    | 61          | 24.9 | 95       | 34.4 | 11          | 14.5  | 13       | 16.5  |
| <b>II</b>                                   | 95          | 38.8 | 101      | 36.6 | 36          | 47.4  | 28       | 35.4  |
| <b>III</b>                                  | 33          | 13.5 | 17       | 6.2  | 22          | 28.9  | 19       | 24.1  |
| <b>Missing</b>                              | 56          | 22.9 | 63       | 22.8 | 7           | 9.2   | 19       | 24.1  |
| <b>Surgery type</b>                         |             |      |          |      |             |       |          |       |
| <b>Breast conserving</b>                    | 20          | 8.2  | 42       | 15.2 | 11          | 14.5  | 12       | 15.2  |
| <b>Mastectomy</b>                           | 225         | 91.8 | 234      | 84.8 | 65          | 85.5  | 67       | 84.8  |
| <b>Systemic adjuvant chemotherapy</b>       |             |      |          |      | <=          |       |          |       |
| <b>No</b>                                   | 211         | 86.1 | 251      | 90.9 | 5           |       | 26       | 32.9  |
| <b>Yes</b>                                  | 34          | 13.9 | 25       | 9.1  | <= 75       |       | 53       | 67.1  |
| <b>Radiation therapy</b>                    |             |      |          |      |             |       |          |       |
| <b>No</b>                                   | 171         | 69.8 | 179      | 64.9 | 43          | 56.6  | 36       | 45.6  |
| <b>Yes</b>                                  | 74          | 30.2 | 97       | 35.1 | 32          | 42.1  | 34       | 43.0  |
| <b>Missing</b>                              | 0           | 0    | 0        | 0    | 1           | 1.3   | 9        | 11.4  |
| <b>Tamoxifen protocol, years</b>            |             |      |          |      |             |       |          |       |
| <b>N/A</b>                                  | 0           | 0    | 0        | 0    | 76          | 100.0 | 79       | 100.0 |
| <b>1</b>                                    | 116         | 47.3 | 126      | 45.7 | 0           | 0     | 0        | 0     |
| <b>2</b>                                    | 40          | 16.3 | 46       | 16.7 | 0           | 0     | 0        | 0     |
| <b>5</b>                                    | 89          | 36.3 | 104      | 37.7 | 0           | 0     | 0        | 0     |

S4 Table. Patient characteristics with Ki-67 median=high.

| Patient characteristics<br>Ki-67 median=high | ER/TAM type |       |          |       |             |       |          |       |
|----------------------------------------------|-------------|-------|----------|-------|-------------|-------|----------|-------|
|                                              | ER+/TAM+    |       |          |       | ER-/TAM-    |       |          |       |
|                                              | Case status |       |          |       | Case status |       |          |       |
|                                              | Cases       |       | Controls |       | Cases       |       | Controls |       |
|                                              | N           | %     | N        | %     | N           | %     | N        | %     |
| <b>Total</b>                                 | 188         | 100.0 | 160      | 100.0 | 170         | 100.0 | 157      | 100.0 |
| <b>Year of diagnosis</b>                     |             |       |          |       |             |       |          |       |
| <b>85-93</b>                                 | 78          | 41.5  | 72       | 45.0  | 64          | 37.6  | 55       | 35.0  |
| <b>94-96</b>                                 | 33          | 17.6  | 29       | 18.1  | 43          | 25.3  | 46       | 29.3  |
| <b>97-01</b>                                 | 77          | 41.0  | 59       | 36.9  | 63          | 37.1  | 56       | 35.7  |

| Patient characteristics<br>Ki-67 median=high | ER/TAM type |      |          |      |             |       |          |       |
|----------------------------------------------|-------------|------|----------|------|-------------|-------|----------|-------|
|                                              | ER+/TAM+    |      |          |      | ER-/TAM-    |       |          |       |
|                                              | Case status |      |          |      | Case status |       |          |       |
|                                              | Cases       |      | Controls |      | Cases       |       | Controls |       |
|                                              | N           | %    | N        | %    | N           | %     | N        | %     |
| <b>Age at diagnosis</b>                      |             |      |          |      |             |       |          |       |
| <b>35-44</b>                                 | <= 5        |      | 9        | 5.6  | 38          | 22.4  | 32       | 20.4  |
| <b>45-54</b>                                 | 44          | 23.4 | 30       | 18.8 | 66          | 38.8  | 59       | 37.6  |
| <b>55-64</b>                                 | <= 97       |      | 83       | 51.9 | 50          | 29.4  | 46       | 29.3  |
| <b>65-70</b>                                 | 46          | 24.5 | 38       | 23.8 | 16          | 9.4   | 20       | 12.7  |
| <b>Menopausal status</b>                     |             |      |          |      |             |       |          |       |
| <b>Premenopausal</b>                         | 13          | 6.9  | 15       | 9.4  | 65          | 38.2  | 59       | 37.6  |
| <b>Postmenopausal</b>                        | 175         | 93.1 | 145      | 90.6 | 105         | 61.8  | 98       | 62.4  |
| <b>UICC tumor stage</b>                      |             |      |          |      |             |       |          |       |
| <b>I</b>                                     | <= 5        |      | <= 5     |      | 8           | 4.7   | 13       | 8.3   |
| <b>II</b>                                    | 85          | 45.2 | 84       |      | 95          | 55.9  | 85       | 54.1  |
| <b>III</b>                                   | <= 102      |      | 75       | 46.9 | 67          | 39.4  | 59       | 37.6  |
| <b>Histological grade</b>                    |             |      |          |      |             |       |          |       |
| <b>I</b>                                     | 23          | 12.2 | 23       | 14.4 | 7           | 4.1   | <= 5     |       |
| <b>II</b>                                    | 93          | 49.5 | 73       | 45.6 | 72          | 42.4  | 50       | 31.8  |
| <b>III</b>                                   | 44          | 23.4 | 32       | 20.0 | 66          | 38.8  | <= 70    |       |
| <b>Missing</b>                               | 28          | 14.9 | 32       | 20.0 | 25          | 14.7  | 36       | 22.9  |
| <b>Surgery type</b>                          |             |      |          |      |             |       |          |       |
| <b>Breast conserving</b>                     | 23          | 12.2 | 14       | 8.8  | 24          | 14.1  | 35       | 22.3  |
| <b>Mastectomy</b>                            | 165         | 87.8 | 146      | 91.3 | 145         | 85.3  | 122      | 77.7  |
| <b>Missing</b>                               | 0           | 0    | 0        | 0    | 1           | 0.6   | 0        | 0     |
| <b>Systemic adjuvant chemotherapy</b>        |             |      |          |      |             |       |          |       |
| <b>No</b>                                    | 166         | 88.3 | 138      | 86.3 | 33          | 19.4  | 68       | 43.3  |
| <b>Yes</b>                                   | 22          | 11.7 | 22       | 13.8 | 137         | 80.6  | 89       | 56.7  |
| <b>Radiation therapy</b>                     |             |      |          |      |             |       |          |       |
| <b>No</b>                                    | 112         | 59.6 | 102      | 63.8 | 96          | 56.5  | 70       | 44.6  |
| <b>Yes</b>                                   | 76          | 40.4 | 58       | 36.3 | 70          | 41.2  | 62       | 39.5  |
| <b>Missing</b>                               | 0           | 0    | 0        | 0    | 4           | 2.4   | 25       | 15.9  |
| <b>Tamoxifen protocol, years</b>             |             |      |          |      |             |       |          |       |
| <b>N/A</b>                                   | 0           | 0    | 0        | 0    | 170         | 100.0 | 157      | 100.0 |
| <b>1</b>                                     | 86          | 45.7 | 75       | 46.9 | 0           | 0     | 0        | 0     |
| <b>2</b>                                     | 29          | 15.4 | 27       | 16.9 | 0           | 0     | 0        | 0     |
| <b>5</b>                                     | 73          | 38.8 | 58       | 36.3 | 0           | 0     | 0        | 0     |

**S5 Table. Distributions of the mean and hotspot Ki-67 score across ER/TAM-strata.**

|                        | ER+/TAM+ |          | ER-/TAM- |          |
|------------------------|----------|----------|----------|----------|
|                        | No. (%)  |          | No. (%)  |          |
|                        | Cases    | Controls | Cases    | Controls |
| Mean Ki-67 (3 cores)   |          |          |          |          |
| <b>&lt;30%</b>         | 420      | 424      | 198      | 188      |
| <b>30% or above</b>    | 13       | 13       | 45       | 47       |
| Mean Ki-67 (3 cores)   |          |          |          |          |
| <b>&lt; median*</b>    | 245      | 277      | 74       | 79       |
| <b>Median or above</b> | 188      | 160      | 169      | 156      |
| Hotspot                |          |          |          |          |
| <b>&lt;30%</b>         | 408      | 412      | 181      | 172      |
| <b>30% or above</b>    | 25       | 25       | 62       | 63       |
| Hotspot                |          |          |          |          |
| <b>&lt;median*</b>     | 242      | 273      | 79       | 80       |
| <b>Median or above</b> | 191      | 164      | 164      | 155      |

\*medians are full sample medians

**S6 Table. Descriptives; age at surgery, Ki-67-mean and hotspot by ER/TAM group.**

|                           | ER+/TAM+ |                            |        |                | ER-/TAM- |                            |        |                  | OVERALL<br>MEAN |
|---------------------------|----------|----------------------------|--------|----------------|----------|----------------------------|--------|------------------|-----------------|
|                           | N        | Mean<br>(Std<br>Deviation) | Median | Range          | N        | Mean<br>(Std<br>Deviation) | Median | Range            |                 |
| <b>AGE AT<br/>SURGERY</b> | 962      | 59.1 (6.7)                 |        | 34 (35-<br>69) | 539      | 52.7 (8.9)                 |        | 34 (35-<br>69)   | 56.8            |
| <b>KI-67<br/>MEAN</b>     | 870      | 7.5 (9.1)                  |        | 79 (0-<br>79)  | 478      | 17.2 (17.3)                |        | 90 (0.01-<br>90) | 10.9            |
| <b>HOTSPOT</b>            | 870      | 9.7 (10.8)                 | 6.7    | 79 (0-<br>79)  | 478      | 21.4 (20.1)                | 15.2   | 92 (0.03-<br>92) | 13.8            |

**S7 Table. Adjusted ORs by ER-specific medians.**

| ER+/Tam+          | ER-/Tam-          |
|-------------------|-------------------|
| Adjusted OR (95%) | Adjusted OR (95%) |
| 0.79 (0.60,1.06)  | 1.18 (0.78,1.80)  |

**S8 Table. Associations between Ki-67-expression score and breast cancer recurrence within strata, adjusted also for grade.**

| DIA Ki-67 expression | ER+/Tam+                     |                     |                                |                                 | ER-/Tam-                          |                     |                                |                                 |
|----------------------|------------------------------|---------------------|--------------------------------|---------------------------------|-----------------------------------|---------------------|--------------------------------|---------------------------------|
|                      | Recurrent cases/controls (n) | Matched OR (95% CI) | Adjusted OR (95%) <sup>a</sup> | Adjusted OR2 (95%) <sup>b</sup> | Recurrent cases/controls or means | Matched OR (95% CI) | Adjusted OR (95%) <sup>a</sup> | Adjusted OR2 (95%) <sup>b</sup> |
| All cores            |                              |                     |                                |                                 |                                   |                     |                                |                                 |
| <median              | 245/276                      | 1                   | 1                              | 1                               | 76/79                             | 1                   | 1                              | 1                               |
| ≥median              | 188/160                      | 0.75 (0.55,1.03)    | 0.72 (0.54,0.96)               | <b>0.74 (0.52,1.04)</b>         | 170/157                           | 1.00 (0.66,1.53)    | 0.85 (0.54,1.34)               | <b>0.89 (0.53,1.50)</b>         |
| Hotspot core         |                              |                     |                                |                                 |                                   |                     |                                |                                 |
| <median              | 243/272                      | 1                   | 1                              | 1                               | 80/80                             | 1                   | 1                              | 1                               |
| ≥median              | 190/164                      | 0.78 (0.57,1.07)    | 0.73 (0.55,0.98)               | <b>0.80 (0.57,1.13)</b>         | 166/156                           | 1.05 (0.69,1.59)    | 0.86 (0.55,1.35)               | <b>0.87 (0.52,1.49)</b>         |

<sup>a</sup> Adjusted for year of diagnosis, menopausal status, county of residence, UICC stage, receipt of chemotherapy, type of surgery, age category, receipt of radiotherapy and comorbidity. Line number two includes grade (high number of missing reduced sample size).

<sup>b</sup> Adjusted also for grade.

**S9 Table. Association between DIA-Ki-67 score and breast cancer recurrence, by median time to recurrence.**

|                 | Time to recurrence (yrs post diagnosis) | Median time to recurrence (yrs) <sup>‡</sup> | Cases/controls | Matched OR (95% CI) <sup>a</sup> | Adjusted OR (95% CI) <sup>b</sup> |
|-----------------|-----------------------------------------|----------------------------------------------|----------------|----------------------------------|-----------------------------------|
| <b>ER+/Tam+</b> |                                         |                                              |                |                                  |                                   |
|                 | 1-5                                     | 2.8                                          | 329/125        | 0.75 (0.48,1.17)                 | 0.74 (0.47,1.18)                  |
|                 | 6-10                                    | 6.7                                          | 104/311        | 0.86 (0.53,1.40)                 | 0.83 (0.50,1.37)                  |
| <b>ER-/Tam-</b> |                                         |                                              |                |                                  |                                   |
|                 | 1-5                                     | 2.1                                          | 223/70         | 0.69 (0.37,1.27)                 | 0.68 (0.34,1.39)                  |
|                 | 6-10                                    | 6.9                                          | 23/166         | 1.85 (0.68,5.04)                 | 1.40 (0.40,4.90)                  |

<sup>‡</sup> Median time to recurrence based on recurrent cases.

<sup>a</sup> Estimated using conditional logistic regression with conditioning on the matched factors (diagnosis year, county of residence, menopausal status and UICC stage).

<sup>b</sup> Estimated using logistic regression with additional adjustment for chemotherapy, receipt of radiotherapy, type of surgery, age category at diagnosis and comorbidity. Due to missing values, adjusted analyses were calculated in lower number of cases/controls than the matched analysis (For ER+/Tam+: 2.8 yrs=320/121, 6.6 yrs=100/304, and for ER-/Tam-: 2.1 yrs=210/60, 6.9 yrs=22/136).

**S10 Table. Adjusted ORs by chemo - overall median.**

|                        | ER <sup>+</sup> /Tam <sup>+</sup> | ER <sup>-</sup> /Tam <sup>-</sup> |
|------------------------|-----------------------------------|-----------------------------------|
|                        | Adjusted OR<br>(95%)              | Adjusted OR<br>(95%)              |
| <b>No Chemotherapy</b> | 0.64 (0.47,0.88)                  | 0.19 (0.04,0.94)                  |
| <b>Chemotherapy</b>    | 1.38 (0.55,3.47)                  | 1.02 (0.62,1.69)                  |

**S11 Table. Adjusted ORs by chemo and ER-specific medians.**

|                        | ER <sup>+</sup> /Tam <sup>+</sup> | ER <sup>-</sup> /Tam <sup>-</sup> |
|------------------------|-----------------------------------|-----------------------------------|
|                        | Adjusted OR<br>(95%)              | Adjusted OR<br>(95%)              |
| <b>No Chemotherapy</b> | 0.73 (0.54,0.99)                  | 0.75 (0.24,2.31)                  |
| <b>Chemotherapy</b>    | 1.43 (0.52,3.92)                  | 1.40 (0.87,2.26)                  |
